# Supplementary material
Source: publisher figshare collection journal article supplement (https://sage.figshare.com/ndownloader/files/15017309)
Supplement: Supplementary file 1 [file 15017309]

Table S1. Criteria for inclusion in the study registry of urgent-emergent paediatrics visits to Paediatric Emergency Departments in Nicaragua

|                                            |                                                                                                                                                                                                                                                                                                            |
|--------------------------------------------|------------------------------------------------------------------------------------------------------------------------------------------------------------------------------------------------------------------------------------------------------------------------------------------------------------|
| <b>Neurologic</b>                          | <ul style="list-style-type: none"> <li>• Persistent altered mental status (GCS &lt; 15)</li> <li>• Signs of raised intracranial pressure</li> <li>• Signs of severe neuroinfection</li> <li>• Active seizures on arrival</li> <li>• Acute focal neurological signs</li> </ul>                              |
| <b>Respiratory</b>                         | <ul style="list-style-type: none"> <li>• Signs of airway obstruction</li> <li>• Severe respiratory distress (based on PALS 2015)</li> <li>• Bradipnoea/apnoea</li> </ul>                                                                                                                                   |
| <b>Cardiovascular</b>                      | <ul style="list-style-type: none"> <li>• Cardiac arrest</li> <li>• Signs of shock (based on PALS 2015)</li> <li>• Tachycardia/bradycardia</li> <li>• Signs of cardiac failure</li> <li>• Suspected sepsis</li> <li>• Hypoxic spells</li> </ul>                                                             |
| <b>Gastrointestinal</b>                    | <ul style="list-style-type: none"> <li>• Acute gastroenteritis (vomiting and/or diarrhea) with severe dehydration (based on clinician judgment)</li> <li>• Gastrointestinal bleeding</li> <li>• Acute abdomen</li> </ul>                                                                                   |
| <b>Metabolic</b>                           | <ul style="list-style-type: none"> <li>• Diabetic ketoacidosis</li> </ul>                                                                                                                                                                                                                                  |
| <b>Injury</b>                              | <ul style="list-style-type: none"> <li>• Potentially severe isolated (single site) or multiple trauma</li> <li>• Burns &gt; 20% BSA</li> <li>• Venomous snake bite</li> <li>• Poisoning (high risk-based on respiratory, neurologic, cardiovascular, and/or gastrointestinal signs or symptoms)</li> </ul> |
| <b>Suspected Dengue with warning signs</b> |                                                                                                                                                                                                                                                                                                            |

BSA= Body Surface Area; GCS= Glasgow Coma Scale;

Table S2. Common tokens (including bigrams) among the 500 bootstrapped final validated model appearing in the top 100 of each model (according to the TF-IDF weight)

| Tokens (including bigrams) |
|----------------------------|
| cetoacidosis               |
| dengue                     |
| diabetes                   |
| grado                      |
| intoxicacion               |
| “intoxicacio por”          |
| quemadura                  |
| sepsis                     |
| shock                      |
| sustancia                  |
| trauma                     |
